# Supplementary material for: (C 13 N 3 H 14 ) 2 MBr 4 (M = Zn, Cd): two novel hybrid metal halides with balanced integrated nonlinear optical performance
Source: Royal Society of Chemistry journal article supplement (doi:10.1039/d4qi01729c), 2024-01-01
Supplement: d4qi01729c1.pdf [file d4qi01729c1.pdf]

## Supporting Information

### **(C<sub>13</sub>N<sub>3</sub>H<sub>14</sub>)<sub>2</sub>MBr<sub>4</sub> (M=Zn, Cd): Two Novel Hybrid Metal Halides with Balanced Integrated Nonlinear Optical Performance**

Jiajing Wu\*, Yi-Fan Fu, Wenlong Liu, and Sheng-Ping Guo\*

School of Chemistry and Chemical Engineering, Yangzhou University, Yangzhou, Jiangsu 225002, P.  
R. China.

E-mail: [jiajingw@yzu.edu.cn](mailto:jiajingw@yzu.edu.cn), [spguo@yzu.edu.cn](mailto:spguo@yzu.edu.cn).

# Contents

**Table S1.** Crystal data and structural refinement for **1** and **2**.

**Table S2.** Fractional atomic coordinates ( $\times 10^4$ ) and equivalent isotropic displacement parameters ( $\text{\AA}^2 \times 10^3$ ) for **1** and **2**.  $U_{\text{eq}}$  is defined as 1/3 of the trace of the orthogonalized  $U_{ij}$  tensor.

**Table S3.** Bond lengths for **1** and **2**.

**Table S4.** Bond angles for **1** and **2**.

**Table S5.** Hydrogen bond lengths ( $\text{\AA}$ ) for **1** and **2**.

**Table S6.** The  $x/y/z$ -projections of local dipole moments (DM) of  $[\text{ZnBr}_4]^{2-}$  and  $[\text{CdBr}_4]^{2-}$  in one-unit cell of **1** and **2**.

**Table S7.** The bond distortion degree ( $\Delta d$ ) and bond angle distortion ( $\sigma^2$ ) of the  $\text{ZnBr}_4$  (**1**) and  $\text{CdBr}_4$  (**2**) tetrahedra.

**Table S8.** Linear and nonlinear optical properties of organic-inorganic hybrid ionic metal halides containing  $d^{10}$  transition metal cations

**Table S9.** Point charge model analysis of **1** and **2**. According to the crystal structure data collected at 296 K, we select a unit cell and assume that the centers of the positive charges of the organic cations and the negative charges of the  $(\text{ZnBr}_4)^{2-}$  and  $(\text{CdBr}_4)^{2-}$  are located on the C and Cd/Zn atoms, respectively.

**Table S10.** Bond valence sum of  $\text{Cd}^{2+}$  and  $\text{Zn}^{2+}$  ions in **1** and **2**.

**Table S11.** Measured LIDTs of **1**, **2** and AGS for their powder samples.

**Table S12.** The calculated frequency-dependent NLO coefficients of **1** and **2**.

**Figure S1.** (a) The structure of **2** along the *c*-axis; (b) The inorganic and organic parts rotating along the *c* axis with  $2_1$  helical symmetry; (c) The organic layers in the *ac* plane; (d) The inorganic layers in the *bc* plane and their dipole moments. Hydrogen atoms are omitted for clarity.

**Figure S2.** Hydrogen bonds in **1** (a) and **2** (b).

**Figure S3.** Dipole moments of  $[\text{MBr}_4]^{2-}$  and  $\text{C}_{13}\text{N}_3\text{H}_{14}^+$  in one-unit cell. (a) **1**; (b) **2**. Blue:  $[\text{MBr}_4]^{2-}$ ; orange and purple:  $\text{C}_{13}\text{N}_3\text{H}_{14}^+$ . The red arrows in the middle present the total dipole moments of the inorganic parts and organic parts, respectively.

**Figure S4.** Simulated and experimental powder X-ray diffraction patterns of **1** and **2**.

**Figure S5.** The TGA curves of **1** (a) and **2** (b).

**Figure S6.** Crystal photographs of **1** (a) and **2** (b).

**Figure S7** Distribution of C and Zn/Cd atoms in unit cells of **1** (a) and **2** (b).

**Figure S8.** Calculated frequency-dependent NLO coefficients of **1** (a) and **2** (b).

**Table S1.** Crystal data and structural refinement for **1** and **2**.

| Empirical formula                         | (C <sub>13</sub> N <sub>3</sub> H <sub>14</sub> ) <sub>2</sub> ZnBr <sub>4</sub> ( <b>1</b> ) | (C <sub>13</sub> N <sub>3</sub> H <sub>14</sub> ) <sub>2</sub> CdBr <sub>4</sub> ( <b>2</b> ) |
|-------------------------------------------|-----------------------------------------------------------------------------------------------|-----------------------------------------------------------------------------------------------|
| Formula weight/g mol <sup>-1</sup>        | 809.55                                                                                        | 856.58                                                                                        |
| Temperature/K                             | 296                                                                                           | 296                                                                                           |
| Crystal system                            | orthorhombic                                                                                  | orthorhombic                                                                                  |
| Space group                               | <i>Pna2</i> <sub>1</sub>                                                                      | <i>Pna2</i> <sub>1</sub>                                                                      |
| <i>a</i> /Å                               | 12.9297(7)                                                                                    | 13.0023(5)                                                                                    |
| <i>b</i> /Å                               | 14.7057(7)                                                                                    | 14.6412(5)                                                                                    |
| <i>c</i> /Å                               | 15.9445(7)                                                                                    | 16.1558(6)                                                                                    |
| <i>α</i> /°                               | 90                                                                                            | 90                                                                                            |
| <i>β</i> /°                               | 90                                                                                            | 90                                                                                            |
| <i>γ</i> /°                               | 90                                                                                            | 90                                                                                            |
| Volume/Å <sup>3</sup>                     | 3031.7(3)                                                                                     | 3075.6(2)                                                                                     |
| <i>Z</i>                                  | 4                                                                                             | 4                                                                                             |
| $\rho_{\text{calc}}$ (g/cm <sup>3</sup> ) | 1.774                                                                                         | 1.85                                                                                          |
| $\mu$ /mm <sup>-1</sup>                   | 6.108                                                                                         | 5.932                                                                                         |
| <b>F(000)</b>                             | 1584.0                                                                                        | 1656.0                                                                                        |
| <b>2<math>\theta</math> range (deg)</b>   | 4.912 - 55.122                                                                                | 4.19 - 55.162                                                                                 |
| <b>Index ranges</b>                       | -16 ≤ <i>h</i> ≤ 16, -15 ≤ <i>k</i> ≤ 19,<br>-20 ≤ <i>l</i> ≤ 20                              | -16 ≤ <i>h</i> ≤ 16, -19 ≤ <i>k</i> ≤ 18,<br>-21 ≤ <i>l</i> ≤ 20                              |
| <b>Reflections collected</b>              | 45996                                                                                         | 46484                                                                                         |
| <b>Independent reflections</b>            | 6959 [R <sub>int</sub> = 0.0579, R <sub>sigma</sub> = 0.0495]                                 | 7086 [R <sub>int</sub> = 0.0826, R <sub>sigma</sub> = 0.0791]                                 |

**Table S1.** Crystal data and structural refinement for **1** and **2**.

|                                                             |                           |                           |
|-------------------------------------------------------------|---------------------------|---------------------------|
| <b>GOF on F<sup>2</sup></b>                                 | 1.021                     | 1.004                     |
| <b>Final R indexes</b><br>[I ≥ 2σ (I)]                      | R1 = 0.0352, wR2 = 0.0564 | R1 = 0.0420, wR2 = 0.0430 |
| <b>Final R indexes</b><br>[all data]                        | R1 = 0.0620, wR2 = 0.0625 | R1 = 0.0920, wR2 = 0.0498 |
| <b>Δρ<sub>max</sub>, Δρ<sub>min</sub> /e Å<sup>-3</sup></b> | 0.34/-0.56                | 0.40/-0.50                |
| <b>Flack parameter</b>                                      | 0.011 (5)                 | 0.000(5)                  |

$R1 = \Sigma||F_o|-|F_c|| / \Sigma|F_o|$ ,  $wR2 = \{\Sigma[w(|F_o|^2 - |F_c|^2)^2] / \Sigma[w(|F_o|^4)]\}^{1/2}$  and  $w = 1/[\sigma^2(F_o^2)+(0.0462P)^2]$ ,  
where  $P = (F_o^2+2F_c^2)/3$ .

**Table S2.** Fractional atomic coordinates ( $\times 10^4$ ) and equivalent isotropic displacement parameters ( $\text{\AA}^2 \times 10^3$ ) for **1** and **2**.  $U_{\text{eq}}$  is defined as 1/3 of the trace of the orthogonalized  $U_{ij}$  tensor.

| Atom  | <i>x</i>  | <i>y</i>  | <i>z</i>  | $U_{\text{eq}}$ |
|-------|-----------|-----------|-----------|-----------------|
| (1)   |           |           |           |                 |
| Br(1) | 3690.4(4) | 7058.1(3) | 6658.0(4) | 38.06(13)       |
| Br(2) | 2880.8(5) | 5854.3(4) | 4638.8(3) | 40.41(15)       |
| Br(3) | 1032.8(4) | 5894.5(4) | 6632.3(5) | 51.19(17)       |
| Zn(1) | 2774.1(5) | 5689.7(4) | 6147.5(4) | 36.10(16)       |
| Br(4) | 3537.6(5) | 4317.4(4) | 6616.7(5) | 54.31(17)       |
| N(2)  | 6885(4)   | 6542(3)   | 5762(3)   | 46.0(12)        |
| N(5)  | 4146(4)   | 2706(3)   | 2947(3)   | 48.7(13)        |
| N(4)  | 3937(3)   | 3822(3)   | 3944(3)   | 43.2(12)        |
| N(6)  | 2519(3)   | 3093(3)   | 3363(3)   | 40.2(12)        |
| N(3)  | 5492(4)   | 5999(3)   | 5013(3)   | 46.4(13)        |
| C(7)  | 3537(4)   | 3210(4)   | 3423(3)   | 34.4(13)        |
| C(20) | 6123(4)   | 6661(4)   | 5208(3)   | 38.3(14)        |
| N(1)  | 6016(5)   | 7457(4)   | 4845(4)   | 68.7(17)        |
| C(5)  | 5374(3)   | 3623(3)   | 4895(2)   | 44.6(14)        |
| C(4)  | 6420(3)   | 3704(3)   | 5084(2)   | 59.3(18)        |
| C(3)  | 7096(2)   | 4076(3)   | 4500(3)   | 63(2)           |
| C(2)  | 6727(3)   | 4366(3)   | 3726(3)   | 63(2)           |

**Table S2.** Fractional atomic coordinates ( $\times 10^4$ ) and equivalent isotropic displacement parameters ( $\text{\AA}^2 \times 10^3$ ) for **1** and **2**.  $U_{\text{eq}}$  is defined as 1/3 of the trace of the orthogonalized  $U_{ij}$  tensor.

| Atom  | $x$     | $y$     | $z$        | $U_{\text{eq}}$ |
|-------|---------|---------|------------|-----------------|
| C(1)  | 5682(3) | 4285(3) | 3536.8(19) | 48.3(16)        |
| C(6)  | 5005(2) | 3914(3) | 4121(2)    | 35.5(13)        |
| C(18) | 6278(2) | 5353(3) | 6713(3)    | 48.4(14)        |
| C(17) | 6488(3) | 4606(3) | 7220(3)    | 56.7(17)        |
| C(16) | 7490(4) | 4270(3) | 7274(3)    | 60.6(19)        |
| C(15) | 8283(2) | 4680(3) | 6822(3)    | 57.5(17)        |
| C(14) | 8072(2) | 5427(3) | 6316(2)    | 48.0(16)        |
| C(19) | 7070(3) | 5763(2) | 6261(2)    | 40.6(14)        |
| C(10) | 188(3)  | 4263(3) | 4838(3)    | 77(2)           |
| C(11) | 1035(3) | 3863(3) | 5228.6(17) | 61.9(19)        |
| C(12) | 1819(3) | 3479(2) | 4749(2)    | 43.6(14)        |
| C(13) | 1757(3) | 3495(2) | 3879(2)    | 36.6(13)        |
| C(8)  | 910(3)  | 3895(3) | 3488.3(18) | 52.4(16)        |
| C(9)  | 126(3)  | 4279(3) | 3968(3)    | 79(2)           |
| C(22) | 4438(4) | 8189(3) | 4390(3)    | 79(2)           |
| C(21) | 5308(3) | 7673(3) | 4199(3)    | 50.3(16)        |
| C(26) | 5490(3) | 7404(3) | 3376(3)    | 73(2)           |
| C(25) | 4803(5) | 7650(4) | 2746(2)    | 91(3)           |

**Table S2.** Fractional atomic coordinates ( $\times 10^4$ ) and equivalent isotropic displacement parameters ( $\text{\AA}^2 \times 10^3$ ) for **1** and **2**.  $U_{\text{eq}}$  is defined as 1/3 of the trace of the orthogonalized  $U_{ij}$  tensor.

| Atom       | <i>x</i>  | <i>y</i>  | <i>z</i>  | $U_{\text{eq}}$ |
|------------|-----------|-----------|-----------|-----------------|
| C(24)      | 3934(4)   | 8166(4)   | 2937(4)   | 85(3)           |
| C(23)      | 3751(3)   | 8436(3)   | 3760(4)   | 101(3)          |
| <b>(2)</b> |           |           |           |                 |
| Cd(1)      | 2757.6(3) | 4416.0(3) | 6088.7(3) | 39.87(13)       |
| Br(2)      | 2919.6(5) | 4135.9(4) | 4509.5(4) | 41.35(18)       |
| Br(1)      | 3674.4(5) | 2916.3(4) | 6644.3(5) | 40.15(16)       |
| Br(3)      | 921.3(5)  | 4161.6(5) | 6632.0(5) | 54.5(2)         |
| Br(4)      | 3574.3(6) | 5894.8(5) | 6580.1(6) | 59.7(2)         |
| N(3)       | 3972(4)   | 6150(3)   | 3848(3)   | 40.9(15)        |
| N(1)       | 4178(4)   | 7306(4)   | 2903(4)   | 51.4(17)        |
| N(2)       | 2563(4)   | 6906(4)   | 3310(3)   | 39.8(15)        |
| N(6)       | 6861(4)   | 3474(4)   | 5755(3)   | 48.7(16)        |
| C(7)       | 3573(5)   | 6780(4)   | 3355(4)   | 34.7(17)        |
| N(5)       | 5495(4)   | 3987(3)   | 4989(3)   | 47.3(16)        |
| C(8)       | 5046(5)   | 6050(4)   | 4026(4)   | 39.3(18)        |
| C(6)       | 1859(5)   | 6547(4)   | 4677(4)   | 41.4(18)        |
| C(9)       | 5694(5)   | 5650(5)   | 3464(4)   | 53(2)           |
| C(5)       | 1099(6)   | 6160(5)   | 5145(5)   | 58(2)           |



**Table S2.** Fractional atomic coordinates ( $\times 10^4$ ) and equivalent isotropic displacement parameters ( $\text{\AA}^2 \times 10^3$ ) for **1** and **2**.  $U_{\text{eq}}$  is defined as 1/3 of the trace of the orthogonalized  $U_{ij}$  tensor.

| Atom  | <i>x</i> | <i>y</i> | <i>z</i> | $U_{\text{eq}}$ |
|-------|----------|----------|----------|-----------------|
| C(20) | 6108(5)  | 3334(5)  | 5207(4)  | 38.2(17)        |
| C(13) | 5414(6)  | 6357(5)  | 4770(4)  | 46.2(19)        |
| C(10) | 6722(6)  | 5554(6)  | 3643(5)  | 67(3)           |
| C(21) | 7036(5)  | 4278(4)  | 6231(4)  | 39.4(18)        |
| C(14) | 5296(7)  | 2285(4)  | 4221(5)  | 50(2)           |
| C(25) | 6480(7)  | 5461(5)  | 7128(5)  | 58(2)           |
| C(1)  | 1808(5)  | 6496(4)  | 3827(4)  | 33.9(17)        |
| C(12) | 6448(7)  | 6251(5)  | 4940(5)  | 57(2)           |
| C(11) | 7104(6)  | 5862(6)  | 4377(6)  | 62(2)           |
| C(17) | 3955(8)  | 1781(6)  | 3009(7)  | 76(3)           |
| C(22) | 8029(5)  | 4619(5)  | 6269(4)  | 50(2)           |
| C(18) | 4823(8)  | 2256(6)  | 2818(5)  | 88(3)           |
| C(26) | 6266(5)  | 4703(5)  | 6670(5)  | 47.2(17)        |
| C(23) | 8225(6)  | 5368(5)  | 6745(5)  | 60(2)           |
| N(4)  | 5998(5)  | 2526(4)  | 4855(4)  | 75(2)           |
| C(2)  | 988(6)   | 6076(5)  | 3456(5)  | 54(2)           |
| C(19) | 5493(6)  | 2501(5)  | 3419(6)  | 69(2)           |
| C(24) | 7439(7)  | 5805(5)  | 7173(5)  | 61(2)           |

**Table S2.** Fractional atomic coordinates ( $\times 10^4$ ) and equivalent isotropic displacement parameters ( $\text{\AA}^2 \times 10^3$ ) for **1** and **2**.  $U_{\text{eq}}$  is defined as 1/3 of the trace of the orthogonalized  $U_{ij}$  tensor.

| <b>Atom</b> | <b><i>x</i></b> | <b><i>y</i></b> | <b><i>z</i></b> | <b><math>U_{\text{eq}}</math></b> |
|-------------|-----------------|-----------------|-----------------|-----------------------------------|
| C(4)        | 277(6)          | 5729(6)         | 4770(6)         | 77(3)                             |
| C(3)        | 220(6)          | 5690(6)         | 3920(6)         | 82(3)                             |
| C(15)       | 4422(8)         | 1826(5)         | 4426(6)         | 72(2)                             |
| C(16)       | 3748(8)         | 1570(6)         | 3814(8)         | 86(3)                             |

**Table S3.** Bond lengths for **1** and **2**.

| Atom  | Atom  | Length/Å  | Atom  | Atom  | Length/Å |
|-------|-------|-----------|-------|-------|----------|
| (1)   |       |           |       |       |          |
| Br(1) | Zn(1) | 2.4729(8) | C(1)  | C(6)  | 1.39     |
| Br(2) | Zn(1) | 2.4217(9) | C(18) | C(17) | 1.39     |
| Br(3) | Zn(1) | 2.3995(8) | C(18) | C(19) | 1.39     |
| Zn(1) | Br(4) | 2.3680(8) | C(17) | C(16) | 1.39     |
| N(2)  | C(20) | 1.334(7)  | C(16) | C(15) | 1.39     |
| N(2)  | C(19) | 1.416(5)  | C(15) | C(14) | 1.39     |
| N(5)  | C(7)  | 1.320(7)  | C(14) | C(19) | 1.39     |
| N(4)  | C(7)  | 1.330(7)  | C(10) | C(11) | 1.39     |
| N(4)  | C(6)  | 1.417(5)  | C(10) | C(9)  | 1.39     |
| N(6)  | C(7)  | 1.331(6)  | C(11) | C(12) | 1.39     |
| N(6)  | C(13) | 1.414(5)  | C(12) | C(13) | 1.39     |
| N(3)  | C(20) | 1.307(7)  | C(13) | C(8)  | 1.39     |
| C(20) | N(1)  | 1.314(7)  | C(8)  | C(9)  | 1.39     |
| N(1)  | C(21) | 1.414(6)  | C(22) | C(21) | 1.39     |
| C(5)  | C(4)  | 1.39      | C(22) | C(23) | 1.39     |
| C(5)  | C(6)  | 1.39      | C(21) | C(26) | 1.39     |
| C(4)  | C(3)  | 1.39      | C(26) | C(25) | 1.39     |
| C(3)  | C(2)  | 1.39      | C(25) | C(24) | 1.39     |

**Table S3.** Bond lengths for **1** and **2**.

| <b>Atom</b> | <b>Atom</b> | <b>Length/Å</b> | <b>Atom</b> | <b>Atom</b> | <b>Length/Å</b> |
|-------------|-------------|-----------------|-------------|-------------|-----------------|
| C(2)        | C(1)        | 1.39            | C(24)       | C(23)       | 1.39            |
| <b>(2)</b>  |             |                 |             |             |                 |
| Cd(1)       | Br(2)       | 2.5926(9)       | C(13)       | C(12)       | 1.381(9)        |
| Cd(1)       | Br(1)       | 2.6549(8)       | C(10)       | C(11)       | 1.362(11)       |
| Cd(1)       | Br(3)       | 2.5710(8)       | C(21)       | C(22)       | 1.385(8)        |
| Cd(1)       | Br(4)       | 2.5388(8)       | C(21)       | C(26)       | 1.375(8)        |
| N(3)        | C(7)        | 1.325(8)        | C(14)       | N(4)        | 1.417(9)        |
| N(3)        | C(8)        | 1.433(8)        | C(14)       | C(19)       | 1.358(10)       |
| N(1)        | C(7)        | 1.321(7)        | C(14)       | C(15)       | 1.361(11)       |
| N(2)        | C(7)        | 1.329(7)        | C(25)       | C(26)       | 1.363(9)        |
| N(2)        | C(1)        | 1.421(7)        | C(25)       | C(24)       | 1.346(11)       |
| N(6)        | C(20)       | 1.335(8)        | C(1)        | C(2)        | 1.369(9)        |
| N(6)        | C(21)       | 1.425(8)        | C(12)       | C(11)       | 1.371(10)       |
| N(5)        | C(20)       | 1.294(7)        | C(17)       | C(18)       | 1.361(11)       |
| C(8)        | C(9)        | 1.370(9)        | C(17)       | C(16)       | 1.364(12)       |
| C(8)        | C(13)       | 1.369(9)        | C(22)       | C(23)       | 1.364(9)        |
| C(6)        | C(5)        | 1.367(9)        | C(18)       | C(19)       | 1.354(11)       |
| C(6)        | C(1)        | 1.377(9)        | C(23)       | C(24)       | 1.389(10)       |
| C(9)        | C(10)       | 1.374(10)       | C(2)        | C(3)        | 1.370(10)       |

**Table S3.** Bond lengths for **1** and **2**.

| <b>Atom</b> | <b>Atom</b> | <b>Length/Å</b> | <b>Atom</b> | <b>Atom</b> | <b>Length/Å</b> |
|-------------|-------------|-----------------|-------------|-------------|-----------------|
| C(5)        | C(4)        | 1.381(10)       | C(4)        | C(3)        | 1.376(12)       |
| C(20)       | N(4)        | 1.320(8)        | C(15)       | C(16)       | 1.374(12)       |

**Table S4.** Bond angles for 1 and 2.

| Atom  | Atom  | Atom  | Angle/°   | Atom  | Atom  | Atom  | Angle/°  |
|-------|-------|-------|-----------|-------|-------|-------|----------|
| (1)   |       |       |           |       |       |       |          |
| Br(2) | Zn(1) | Br(1) | 102.61(3) | C(17) | C(18) | C(19) | 120      |
| Br(3) | Zn(1) | Br(1) | 103.97(3) | C(16) | C(17) | C(18) | 120      |
| Br(3) | Zn(1) | Br(2) | 111.16(4) | C(15) | C(16) | C(17) | 120      |
| Br(4) | Zn(1) | Br(1) | 112.94(3) | C(16) | C(15) | C(14) | 120      |
| Br(4) | Zn(1) | Br(2) | 112.04(3) | C(15) | C(14) | C(19) | 120      |
| Br(4) | Zn(1) | Br(3) | 113.35(4) | C(18) | C(19) | N(2)  | 121.2(3) |
| C(20) | N(2)  | C(19) | 127.1(4)  | C(14) | C(19) | N(2)  | 118.7(3) |
| C(7)  | N(4)  | C(6)  | 124.6(4)  | C(14) | C(19) | C(18) | 120      |
| C(7)  | N(6)  | C(13) | 126.5(4)  | C(11) | C(10) | C(9)  | 120      |
| N(5)  | C(7)  | N(4)  | 120.5(5)  | C(12) | C(11) | C(10) | 120      |
| N(5)  | C(7)  | N(6)  | 118.4(5)  | C(11) | C(12) | C(13) | 120      |
| N(4)  | C(7)  | N(6)  | 121.1(5)  | C(12) | C(13) | N(6)  | 122.2(3) |
| N(3)  | C(20) | N(2)  | 121.4(5)  | C(12) | C(13) | C(8)  | 120      |
| N(3)  | C(20) | N(1)  | 119.5(5)  | C(8)  | C(13) | N(6)  | 117.8(3) |
| N(1)  | C(20) | N(2)  | 119.1(5)  | C(9)  | C(8)  | C(13) | 120      |
| C(20) | N(1)  | C(21) | 126.1(5)  | C(8)  | C(9)  | C(10) | 120      |
| C(4)  | C(5)  | C(6)  | 120       | C(21) | C(22) | C(23) | 120      |
| C(5)  | C(4)  | C(3)  | 120       | C(22) | C(21) | N(1)  | 119.1(4) |

**Table S4. Bond angles for 1 and 2.**

| Atom       | Atom  | Atom  | Angle/°   | Atom  | Atom  | Atom  | Angle/°  |
|------------|-------|-------|-----------|-------|-------|-------|----------|
| C(2)       | C(3)  | C(4)  | 120       | C(26) | C(21) | N(1)  | 120.9(4) |
| C(3)       | C(2)  | C(1)  | 120       | C(26) | C(21) | C(22) | 120      |
| C(2)       | C(1)  | C(6)  | 120       | C(21) | C(26) | C(25) | 120      |
| C(5)       | C(6)  | N(4)  | 118.8(3)  | C(24) | C(25) | C(26) | 120      |
| C(1)       | C(6)  | N(4)  | 121.2(3)  | C(25) | C(24) | C(23) | 120      |
| C(1)       | C(6)  | C(5)  | 120       | C(24) | C(23) | C(22) | 120      |
| <b>(2)</b> |       |       |           |       |       |       |          |
| Br(2)      | Cd(1) | Br(1) | 99.52(3)  | C(26) | C(21) | N(6)  | 122.4(6) |
| Br(3)      | Cd(1) | Br(2) | 112.86(3) | C(26) | C(21) | C(22) | 119.5(7) |
| Br(3)      | Cd(1) | Br(1) | 100.47(3) | C(19) | C(14) | N(4)  | 120.7(8) |
| Br(4)      | Cd(1) | Br(2) | 114.12(3) | C(19) | C(14) | C(15) | 120.3(8) |
| Br(4)      | Cd(1) | Br(1) | 114.32(3) | C(15) | C(14) | N(4)  | 119.0(8) |
| Br(4)      | Cd(1) | Br(3) | 113.90(3) | C(24) | C(25) | C(26) | 121.5(8) |
| C(7)       | N(3)  | C(8)  | 125.0(5)  | C(6)  | C(1)  | N(2)  | 122.0(6) |
| C(7)       | N(2)  | C(1)  | 126.3(5)  | C(2)  | C(1)  | N(2)  | 118.1(7) |
| C(20)      | N(6)  | C(21) | 127.0(6)  | C(2)  | C(1)  | C(6)  | 119.9(6) |
| N(3)       | C(7)  | N(2)  | 121.1(6)  | C(11) | C(12) | C(13) | 121.4(7) |
| N(1)       | C(7)  | N(3)  | 120.3(6)  | C(10) | C(11) | C(12) | 119.2(8) |
| N(1)       | C(7)  | N(2)  | 118.6(6)  | C(18) | C(17) | C(16) | 119.7(9) |

**Table S4.** Bond angles for **1** and **2**.

| <b>Atom</b> | <b>Atom</b> | <b>Atom</b> | <b>Angle/°</b> | <b>Atom</b> | <b>Atom</b> | <b>Atom</b> | <b>Angle/°</b> |
|-------------|-------------|-------------|----------------|-------------|-------------|-------------|----------------|
| C(9)        | C(8)        | N(3)        | 120.7(7)       | C(23)       | C(22)       | C(21)       | 119.3(7)       |
| C(13)       | C(8)        | N(3)        | 118.9(7)       | C(19)       | C(1)        | C(17)       | 120.4(9)       |
| C(13)       | C(8)        | C(9)        | 120.5(7)       | C(25)       | C(26)       | C(21)       | 119.9(7)       |
| C(5)        | C(6)        | C(1)        | 119.7(7)       | C(22)       | C(23)       | C(24)       | 120.8(7)       |
| C(8)        | C(9)        | C(10)       | 120.1(7)       | C(20)       | N(4)        | C(14)       | 127.2(6)       |
| C(6)        | C(5)        | C(4)        | 120.4(7)       | C(1)        | C(2)        | C(3)        | 120.8(8)       |
| N(5)        | C(20)       | N(6)        | 121.3(6)       | C(18)       | C(19)       | C(14)       | 120.1(8)       |
| N(5)        | C(20)       | N(4)        | 118.5(6)       | C(25)       | C(24)       | C(23)       | 118.9(8)       |
| N(4)        | C(20)       | N(6)        | 120.2(6)       | C(3)        | C(4)        | C(5)        | 119.9(8)       |
| C(8)        | C(13)       | C(12)       | 118.5(7)       | C(2)        | C(3)        | C(4)        | 119.3(8)       |
| C(11)       | C(10)       | C(9)        | 120.3(8)       | C(14)       | C(15)       | C(16)       | 119.5(9)       |
| C(22)       | C(21)       | N(6)        | 118.0(6)       | C(17)       | C(16)       | C(15)       | 119.9(9)       |



**Table S5.** Hydrogen bond lengths (Å) for **1** and **2**.

| D–H        | d(D–H) | d(H...A) | d(D...A) | ∠(D–H...A)(°) | A                   |
|------------|--------|----------|----------|---------------|---------------------|
| <b>(1)</b> |        |          |          |               |                     |
| N(1)–H(1)  | 0.86   | 2.72     | 3.477(6) | 148           | Br(2) <sup>#1</sup> |
| N(2)–H(2)  | 0.86   | 2.63     | 3.425(5) | 153           | Br(1) <sup>#1</sup> |
| N(3)–H(3A) | 0.86   | 2.78     | 3.435(5) | 135           | Br(2)               |
| N(4)–H(4)  | 0.86   | 2.68     | 3.468(4) | 152           | Br(2)               |
| N(5)–H(5A) | 0.86   | 2.87     | 3.489(5) | 130           | Br(1) <sup>#2</sup> |
| N(5)–H(5B) | 0.86   | 2.61     | 3.398(5) | 154           | Br(3) <sup>#3</sup> |
| N(6)–H(6)  | 0.86   | 2.65     | 3.486(5) | 163           | Br(1) <sup>#3</sup> |
| <b>(2)</b> |        |          |          |               |                     |
| N(1)–H(1A) | 0.86   | 2.85     | 3.470(6) | 131           | Br(1) <sup>#4</sup> |
| N(1)–H(1B) | 0.86   | 2.63     | 3.408(6) | 152           | Br(3) <sup>#5</sup> |
| N(2)–H(2)  | 0.86   | 2.64     | 3.467(5) | 161           | Br(1) <sup>#5</sup> |
| N(3)–H(3)  | 0.86   | 2.63     | 3.422(5) | 154           | Br(2)               |
| N(4)–H(4A) | 0.86   | 2.81     | 3.532(6) | 142           | Br(2) <sup>#6</sup> |
| N(5)–H(5A) | 0.86   | 2.77     | 3.444(5) | 136           | Br(2)               |
| N(6)–H(6A) | 0.86   | 2.63     | 3.430(5) | 155           | Br(1) <sup>#6</sup> |

Symmetry transformations used to generate equivalent atoms: #1  $1/2+x, 3/2-y, z$ ; #2  $1-x, 1-y, -1/2+z$ ; #3  $1/2-x, -$

$1/2+y, -1/2+z$ ; #4  $1-x, 1-y, -1/2+z$ ; #5  $1/2-x, 1/2+y, -1/2+z$ ; #6  $1/2+x, 1/2-y, z$ .

**Table S6.** The  $x/y/z$ -projections of local dipole moments (DM) of  $[\text{ZnBr}_4]^{2-}$  and  $[\text{CdBr}_4]^{2-}$  in one-unit cell of **1** and **2**.

| Ion                          | $\mu_x$ (D)  | $\mu_y$ (D)  | $\mu_z$ (D) |
|------------------------------|--------------|--------------|-------------|
| <b>(1)</b>                   |              |              |             |
| $[\text{ZnBr}_4]^{2-}$       | -0.382523    | -2.7583769   | 0.35409998  |
| $[\text{ZnBr}_4]^{2-}$       | 0.38043      | 2.75777824   | 0.35409998  |
| $[\text{ZnBr}_4]^{2-}$       | 0.38093562   | -2.7548558   | 0.355347    |
| $[\text{ZnBr}_4]^{2-}$       | -0.3820174   | 2.75780178   | 0.355347    |
| Total $[\text{ZnBr}_4]^{2-}$ | -0.003174815 | 0.002347358  | 1.418893948 |
| <b>(2)</b>                   |              |              |             |
| $[\text{CdBr}_4]^{2-}$       | -0.451625215 | 3.260348857  | 0.006384011 |
| $[\text{CdBr}_4]^{2-}$       | 0.451625215  | -3.260348857 | 0.006384011 |
| $[\text{CdBr}_4]^{2-}$       | 0.451625215  | 3.260348857  | 0.006384011 |
| $[\text{CdBr}_4]^{2-}$       | -0.451625215 | -3.260348857 | 0.006384011 |
| Total $[\text{CdBr}_4]^{2-}$ | -1.73195E-14 | 1.59872E-14  | 0.025536044 |

**Table S7.** The bond distortion degree ( $\Delta d$ ) and bond angle distortion ( $\sigma^2$ ) of the ZnBr<sub>4</sub> (**1**) and CdBr<sub>4</sub> (**2**) tetrahedra.

| Compound | bond              | distance/Å | $d_0/\text{Å}$    | $\Delta d$            |
|----------|-------------------|------------|-------------------|-----------------------|
| <b>1</b> | Zn(1)–Br(1)       | 2.4729     | 2.4155            | $2.52 \times 10^{-4}$ |
|          | Zn(1)–Br(2)       | 2.4217     |                   |                       |
|          | Zn(1)–Br(3)       | 2.3995     |                   |                       |
|          | Zn(1)–Br(4)       | 2.3680     |                   |                       |
| <b>2</b> | Cd(1)–Br(1)       | 2.6549     | 2.5895            | $2.68 \times 10^{-4}$ |
|          | Cd(1)–Br(2)       | 2.5926     |                   |                       |
|          | Cd(1)–Br(3)       | 2.5710     |                   |                       |
|          | Cd(1)–Br(4)       | 2.5388     |                   |                       |
| Compound | Angle             | Angle/°    | $\theta_0/^\circ$ | $\sigma^2$            |
| <b>1</b> | Br(2)–Zn(1)–Br(1) | 102.61     | 109.5             | 22.7824               |
|          | Br(3)–Zn(1)–Br(1) | 103.97     |                   |                       |
|          | Br(3)–Zn(1)–Br(2) | 111.16     |                   |                       |
|          | Br(4)–Zn(1)–Br(1) | 112.94     |                   |                       |
|          | Br(4)–Zn(1)–Br(2) | 112.04     |                   |                       |
|          | Br(4)–Zn(1)–Br(3) | 113.35     |                   |                       |
| <b>2</b> | Br(2)–Cd(1)–Br(1) | 99.52      | 109.5             | 51.2735               |
|          | Br(3)–Cd(1)–Br(1) | 100.47     |                   |                       |
|          | Br(3)–Cd(1)–Br(2) | 112.86     |                   |                       |
|          | Br(4)–Cd(1)–Br(1) | 114.32     |                   |                       |
|          | Br(4)–Cd(1)–Br(2) | 114.12     |                   |                       |
|          | Br(4)–Cd(1)–Br(3) | 113.90     |                   |                       |

**Table S8.** Linear and nonlinear optical properties of organic-inorganic hybrid ionic metal halides containing d<sup>10</sup> transition metal cations

| Compounds                                                                                                       | Space group                                     | SHG efficiency        | Band gap (eV) | Birefringence (@1064 nm) | PM | LIDT       | Ref       |
|-----------------------------------------------------------------------------------------------------------------|-------------------------------------------------|-----------------------|---------------|--------------------------|----|------------|-----------|
| [N(CH <sub>3</sub> ) <sub>4</sub> ] <sub>2</sub> HgBr <sub>2</sub> I <sub>2</sub>                               | <i>P2<sub>1</sub>2<sub>1</sub>2<sub>1</sub></i> | 0.46 × KDP            | 2.8           | 0.031                    | √  | -          | 1         |
| [N(CH <sub>3</sub> ) <sub>4</sub> ] <sub>2</sub> HgI <sub>4</sub>                                               | <i>P2<sub>1</sub>2<sub>1</sub>2<sub>1</sub></i> | 0.5 × KDP             | 2.73          | 0.002                    | ×  | -          | 1         |
| (TpyH <sub>3</sub> )[CdCl <sub>4</sub> ][Cl]                                                                    | <i>P2<sub>1</sub>2<sub>1</sub>2<sub>1</sub></i> | 0.72 × KDP            | 2.85,         | -                        | ×  | -          | 2         |
| (C <sub>20</sub> H <sub>20</sub> P)CuBr <sub>2</sub>                                                            | <i>P2<sub>1</sub></i>                           | 1.1 × KDP             | 3.56          | 0.12                     | √  | -          | 3         |
| (C <sub>20</sub> H <sub>20</sub> P)CuCl <sub>2</sub>                                                            | <i>P2<sub>1</sub></i>                           | 0.89 × KDP            | 3.64          | 0.13                     | √  | -          | 3         |
| NH <sub>4</sub> HgBr <sub>3</sub> ·H <sub>2</sub> O                                                             | <i>Cmm2</i>                                     | 28 × KDP              | 3.40          | 0.183                    | √  | 52.7 × AGS | 4         |
| [(CH <sub>2</sub> ) <sub>3</sub> NH <sub>2</sub> S]CdBr <sub>3</sub>                                            | <i>Cmc2<sub>1</sub></i>                         | 0.73 × KDP            | -             | -                        | -  | -          | 5         |
| (C <sub>6</sub> H <sub>14</sub> N) <sub>2</sub> CdCl <sub>4</sub>                                               | <i>Cmc2<sub>1</sub></i>                         | 0.6 × KDP             | -             | -                        | -  | -          | 6         |
| (C <sub>3</sub> N <sub>6</sub> H <sub>7</sub> )(C <sub>3</sub> N <sub>6</sub> H <sub>6</sub> )HgCl <sub>3</sub> | <i>P2<sub>1</sub></i>                           | 5 × KDP               | 4.4           | 0.246                    | √  | -          | 7         |
| (H <sub>6</sub> C <sub>2</sub> N) <sub>2</sub> CdI <sub>4</sub>                                                 | <i>P2<sub>1</sub>2<sub>1</sub>2<sub>1</sub></i> | 0.5 × KDP             | 3.86          | 0.047                    | ×  | -          | 8         |
| α-(CN <sub>3</sub> H <sub>6</sub> ) <sub>3</sub> Cu <sub>2</sub> I <sub>5</sub>                                 | <i>Fdd2</i>                                     | 1.8 × KDP             | 2.80          | -                        | ×  | -          | 9         |
| (H <sub>7</sub> C <sub>3</sub> N <sub>6</sub> )(H <sub>6</sub> C <sub>3</sub> N <sub>6</sub> )ZnCl <sub>3</sub> | <i>P2<sub>1</sub></i>                           | 2.8 × KDP             | 5.25          | 0.255                    | √  | -          | 10        |
| (S-PCA) CuBr <sub>2</sub>                                                                                       | <i>C2</i>                                       | 0.3 × KDP             | 2.7           | -                        | -  | -          | 11        |
| (S-PCA)CuBr <sub>2</sub> ·0.5H <sub>2</sub> O                                                                   | <i>C2</i>                                       | 0.4 × KDP             | 2.87          | -                        | -  | -          | 11        |
| (S-PCA) CuI <sub>2</sub>                                                                                        | <i>C2</i>                                       | 0.6 × KDP             | 3.66          | -                        | -  | -          | 11        |
| N(CH <sub>3</sub> ) <sub>4</sub> ZnCl <sub>3</sub>                                                              | <i>Pmc2<sub>1</sub></i>                         | 15 × SiO <sub>2</sub> | 3.4           | -                        | ×  | -          | 12        |
| [(Et <sub>3</sub> P(CH <sub>2</sub> ) <sub>2</sub> Cl)][Cd(dca) <sub>3</sub> ]                                  | <i>P2<sub>1</sub>2<sub>1</sub>2<sub>1</sub></i> | 0.16 × KDP            | -             | -                        | -  | -          | 13        |
| [N(CH <sub>3</sub> ) <sub>4</sub> ] HgBrI <sub>2</sub>                                                          | <i>Pmc2<sub>1</sub></i>                         | 4.5 × KDP             | 2.83          | 0.025                    | ×  | -          | 14        |
| [R-MPA] <sub>2</sub> CdCl <sub>4</sub>                                                                          | <i>Cc</i>                                       | 0.53 × KDP            | 4.418         | -                        | -  | -          | 15        |
| [Et <sub>3</sub> (n-Pr)P][Cd(dca) <sub>3</sub> ]                                                                | <i>P2<sub>1</sub>2<sub>1</sub>2<sub>1</sub></i> | 0.12 × KDP            | -             | -                        | -  | -          | 16        |
| (l-Hpro) <sub>2</sub> Cd <sub>5</sub> Cl <sub>12</sub> (1L)                                                     | <i>P1</i>                                       | 0.25 × KDP            | 4.80          | 0.05                     | √  | -          | 17        |
| (l-Hpro)(l-pro)CdCl <sub>3</sub> (2L)                                                                           | <i>P2<sub>1</sub></i>                           | 0.7 × KDP             | 5.10          | 0.06                     | √  | -          | 17        |
| [Me <sub>3</sub> NCH <sub>2</sub> Cl]CdCl <sub>3</sub>                                                          | <i>Cc</i>                                       | 0.73 × KDP            | 5.24          | 0.043                    | √  | -          | 18        |
| (C <sub>13</sub> N <sub>3</sub> H <sub>14</sub> ) <sub>2</sub> ZnBr <sub>4</sub>                                | <i>Pna2<sub>1</sub></i>                         | 1.22 × KDP            | 3.96          | 0.15                     | √  | 28 × AGS   | This work |
| (C <sub>13</sub> N <sub>3</sub> H <sub>14</sub> ) <sub>2</sub> CdBr <sub>4</sub>                                | <i>Pna2<sub>1</sub></i>                         | 1.14 × KDP            | 3.98          | 0.12                     | √  | 25 × AGS   | This work |

**Table S9.** Point charge model analysis of **1** and **2**. According to the crystal structure data collected at 296 K, we select a unit cell and assume that the centers of the positive charges of the organic cations and the negative charges of the  $(\text{ZnBr}_4)^{2-}$  and  $(\text{CdBr}_4)^{2-}$  are located on the C and Cd/Zn atoms, respectively.

| <b>(1)</b>                                                                                                                                                                                                                  |                             |                             |
|-----------------------------------------------------------------------------------------------------------------------------------------------------------------------------------------------------------------------------|-----------------------------|-----------------------------|
| Atom                                                                                                                                                                                                                        | Atom coordinate             | Coordinate of charge center |
| Zn(1)                                                                                                                                                                                                                       | (0.77741, 0.93103, 0.61475) | ( 0.5, 0.5, 0.36475 )       |
| Zn(1)                                                                                                                                                                                                                       | (0.27741, 0.56897, 0.61475) |                             |
| Zn(1)                                                                                                                                                                                                                       | (0.72259, 0.43103, 0.11475) |                             |
| Zn(1')                                                                                                                                                                                                                      | (0.22259, 0.06897, 0.11475) |                             |
| C(7)                                                                                                                                                                                                                        | (0.8537, 0.179, 0.3423)     | (0.5, 0.5, 0.43155)         |
| C(7)                                                                                                                                                                                                                        | (0.3537, 0.321, 0.3423)     |                             |
| C(7)                                                                                                                                                                                                                        | (0.6463, 0.679, 0.8423)     |                             |
| C(7)                                                                                                                                                                                                                        | (0.1463, 0.821, 0.8423)     |                             |
| C(20)                                                                                                                                                                                                                       | (0.1123, 0.8339, 0.5208)    |                             |
| C(20)                                                                                                                                                                                                                       | (0.8877, 0.1661, 0.0208)    |                             |
| C(20)                                                                                                                                                                                                                       | (0.3877, 0.3339, 0.0208)    |                             |
| C(20)                                                                                                                                                                                                                       | (0.6123, 0.6661, 0.5208)    |                             |
| $(0.43155 - 0.36475) \times c \times Z \times e = 0.0668 \times 15.9445 \times 10^{-10} \text{ m} \times 4 \times 1.6 \times 10^{-19} \text{ C}$<br>$= 6.8166 \times 10^{-29} \text{ C} \cdot \text{m} = 20.4735 \text{ D}$ |                             |                             |
| <b>(2)</b>                                                                                                                                                                                                                  |                             |                             |
| Atom                                                                                                                                                                                                                        | Atom coordinate             | Coordinate of charge center |
| Cd(1)                                                                                                                                                                                                                       | (0.27576, 0.4416, 0.60887)  | ( 0.5, 0.5, 0.35887 )       |
| Cd(1')                                                                                                                                                                                                                      | (0.77576, 0.0584, 0.60887)  |                             |
| Cd(1)                                                                                                                                                                                                                       | (0.72424, 0.5584, 0.10887)  |                             |
| Cd(1)                                                                                                                                                                                                                       | (0.22424, 0.9416, 0.10887)  |                             |
| C(7)                                                                                                                                                                                                                        | (0.3573, 0.67798, 0.3355)   | (0.5, 0.5, 0.4281)          |
| C(7)                                                                                                                                                                                                                        | (0.6427, 0.32202, 0.8355)   |                             |
| C(7)                                                                                                                                                                                                                        | (0.8573, 0.82202, 0.3355)   |                             |

|                                                                                                                                                                                                                      |                            |  |
|----------------------------------------------------------------------------------------------------------------------------------------------------------------------------------------------------------------------|----------------------------|--|
| C(7)                                                                                                                                                                                                                 | (0.1427, 0.17798, 0.8355)  |  |
| C(20)                                                                                                                                                                                                                | (0.61078, 0.33337, 0.5207) |  |
| C(20)                                                                                                                                                                                                                | (0.88922, 0.83337, 0.0207) |  |
| C(20)                                                                                                                                                                                                                | (0.11078, 0.16663, 0.5207) |  |
| C(20)                                                                                                                                                                                                                | (0.38922, 0.66663, 0.0207) |  |
| $(0.4281 - 0.35887) \times c \times Z \times e = 0.06923 \times 16.1558 \times 10^{-10} \text{ m} \times 4 \times 1.6 \times 10^{-19} \text{ C}$ $= 7.158 \times 10^{-29} \text{ C}\cdot\text{m} = 21.459 \text{ D}$ |                            |  |
| $(1): \mu_c = 20.4735 / (3031.7 \times 3.7^2) = 4.93 \times 10^{-4} \text{ D}/(\text{\AA}^3 \text{ eV}^2)$                                                                                                           |                            |  |
| $(2): \mu_c = 21.459 / (3075.6 \times 3.84^2) = 4.73 \times 10^{-4} \text{ D}/(\text{\AA}^3 \text{ eV}^2)$                                                                                                           |                            |  |

**Table S10.** Bond valence sum of Cd<sup>2+</sup> and Zn<sup>2+</sup> ions in **1** and **2**.

| <b>Compound</b> | <b>Bond</b> | <b>Bond distance (Å)</b> | <b>Bond valence</b> | <b>Sum</b>  |
|-----------------|-------------|--------------------------|---------------------|-------------|
| <b>1</b>        | Zn–Br(1)    | 2.4729                   | 0.417707867         | 1.962114995 |
|                 | Zn–Br(2)    | 2.4217                   | 0.479440665         |             |
|                 | Zn–Br(3)    | 2.3995                   | 0.510189541         |             |
|                 | Zn–Br(4)    | 2.3680                   | 0.554776922         |             |
| <b>2</b>        | Cd–Br(1)    | 2.6549                   | 0.438531197         | 2.107367332 |
|                 | Cd–Br(2)    | 2.5926                   | 0.51853033          |             |
|                 | Cd–Br(3)    | 2.5710                   | 0.550296917         |             |
|                 | Cd–Br(4)    | 2.5388                   | 0.600008888         |             |

**Table S11.** Measured LIDTs of **1**, **2** and AGS for their crystals.

| Compound | Damage energy<br>(mJ) | Spot area (cm <sup>2</sup> ) | LIDT (MW/cm <sup>2</sup> ) | LIDT (×      |      |
|----------|-----------------------|------------------------------|----------------------------|--------------|------|
|          |                       |                              |                            | LIDT (× AGS) | KDP) |
| AGS      | 1.81                  | 0.022698                     | 7.97                       | 1            |      |
| <b>1</b> | 51.3                  | 0.022698                     | 226.01                     | 28.36        | 0.87 |
| <b>2</b> | 45.2                  | 0.022698                     | 199.14                     | 24.98        | 0.76 |

**Table S12.** The calculated frequency-dependent SHG coefficients of **1** and **2**.

| Compound | Nonvanishing independent SHG coefficients |  | Largest SHG coefficient at 1064 nm (pm/v) |
|----------|-------------------------------------------|--|-------------------------------------------|
|          |                                           |  |                                           |
| <b>1</b> | $d_{15}$                                  |  | 0.34                                      |
|          | $d_{24}$                                  |  | 0.26                                      |
|          | $d_{33}$                                  |  | 0.14                                      |
| <b>2</b> | $d_{15}$                                  |  | 0.32                                      |
|          | $d_{24}$                                  |  | 0.24                                      |
|          | $d_{33}$                                  |  | 0.13                                      |



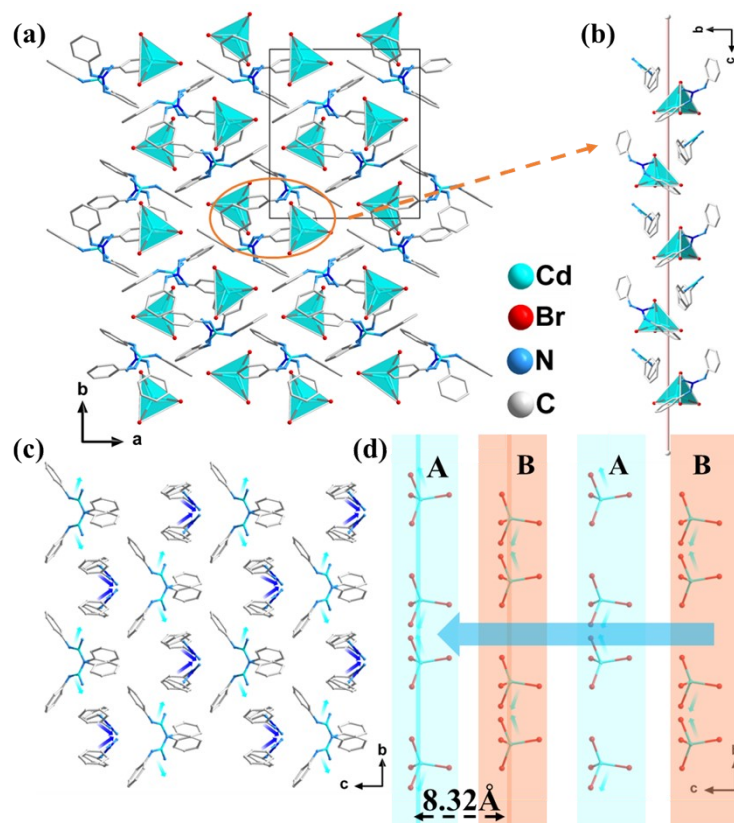

**Figure S1.** (a) The structure of **2** along the *c*-axis; (b) The inorganic and organic parts rotating along the *c* axis with  $2_1$  helical symmetry; (c) The organic layers in the *ac* plane; (d) The inorganic layers in the *bc* plane and their dipole moments. Hydrogen atoms are omitted for clarity.

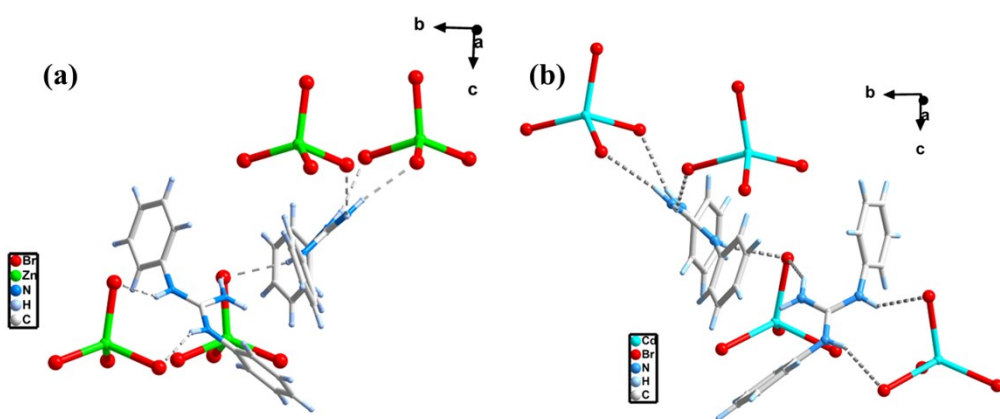

**Figure S2.** The hydrogen bonds in **1** (a) and **2** (b).

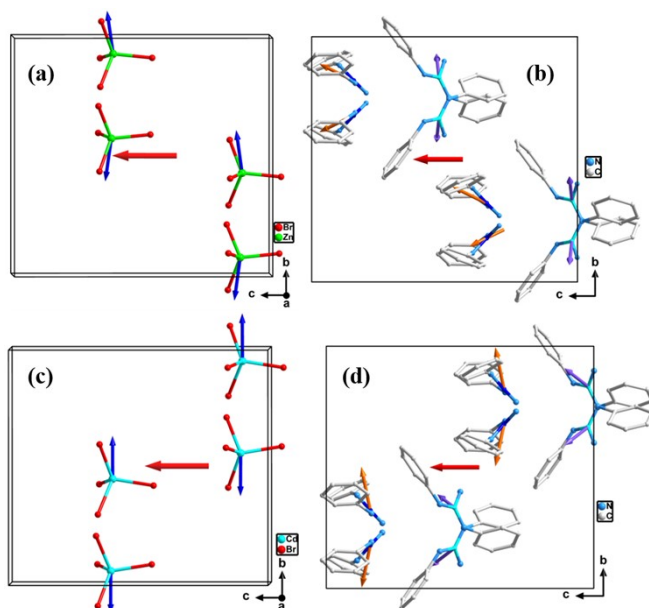

**Figure S3.** Dipole moments of  $[\text{MBr}_4]^{2-}$  and  $\text{C}_{13}\text{N}_3\text{H}_{14}^+$  ions in one-unit cell. (a) **1**; (b) **2**; Blue:  $[\text{MBr}_4]^{2-}$ ; Orange and purple:  $\text{C}_{13}\text{N}_3\text{H}_{14}^+$ . The red arrows in the middle present the total dipole moments of the inorganic parts and organic parts, respectively.

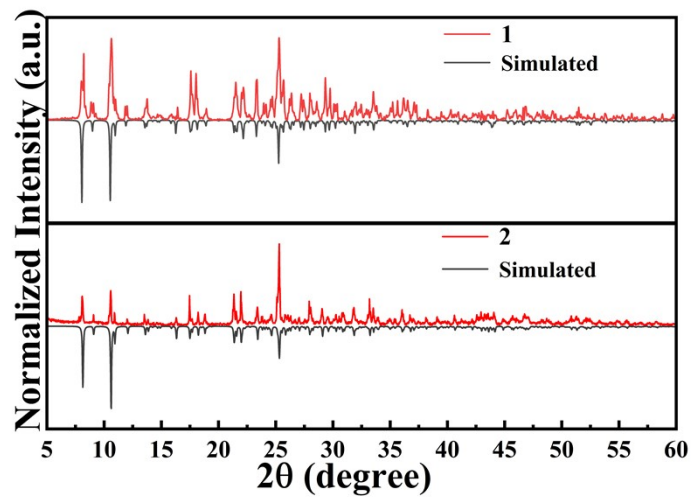

**Figure S4.** Simulated and experimental powder X-ray diffraction patterns of **1** and **2**.

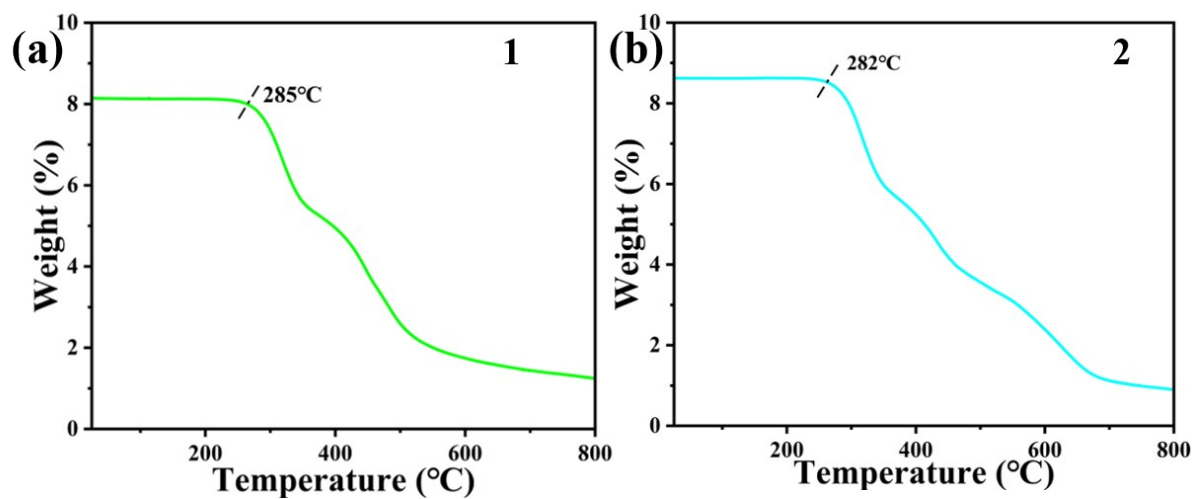

Figure S5. The TGA curves of **1** (a) and **2** (b).

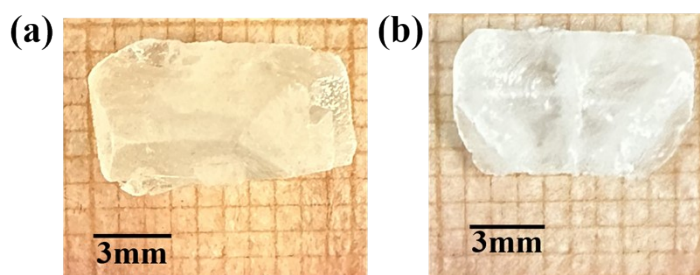

Figure S6. Optical photographs of **1** (a) and **2** (b).

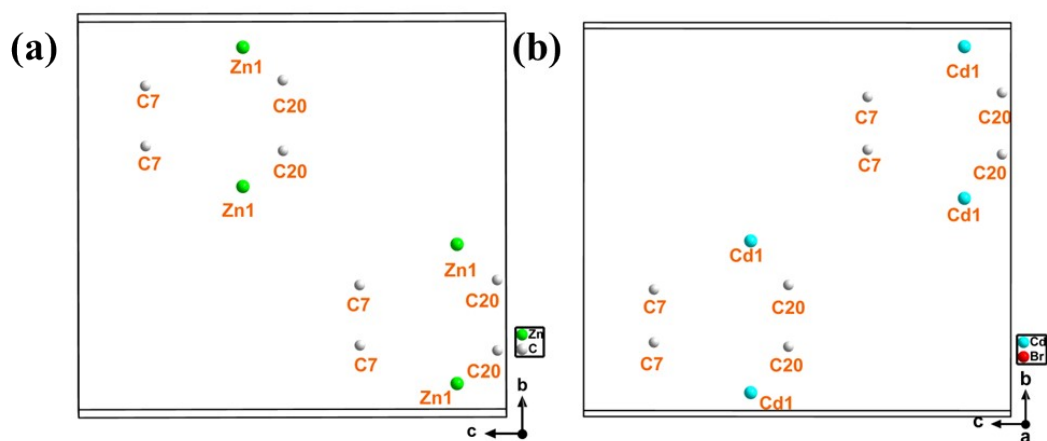

Figure S7. Distribution of C and Zn; C and Cd atoms in unit cells of **1** (a) and **2** (b).

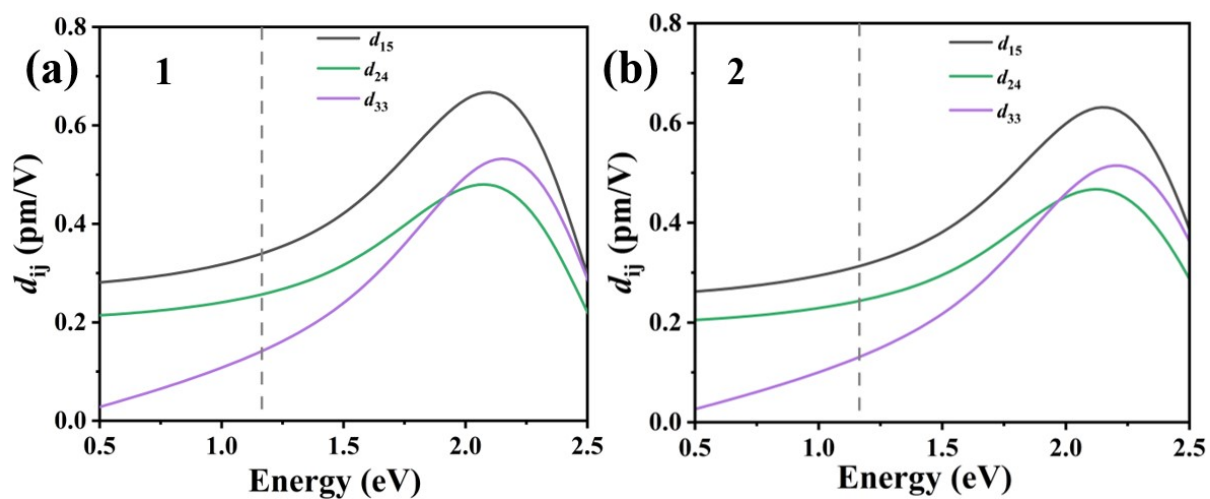

**Figure S8.** Calculated frequency-dependent SHG coefficients of **1** (a) and **2** (b).

## References

- [1]. C. Yang, X. Liu, C. Teng, Q. Wu, F. Liang, Acentric Organic-Inorganic Hybrid Halide  $[\text{N}(\text{CH}_3)_4]_2\text{HgBr}_2\text{I}_2$  Featuring an Isolated  $[\text{HgBr}_2\text{I}_2]^{2-}$  Tetrahedron and Second-Order Nonlinearity, *Inorg. Chem.*, 2021, **60**, 6829–6835.
- [2]. S. Wang, Z. Liang, X. Song, X. Huang, L. Liu, X. Jiang, Z. Lin, H. Liu, Photoluminescence and Nonlinear Optical Properties of Two Terpyridine-Based Hybrid Zn/Cd Halides, *Inorg. Chem.*, 2023, **62**, 21451–21460.
- [3]. J. L. Qi, J. J. Wu, Y. Guo, Z. P. Xu, W. L. Liu and S. P. Guo, Quasi-Linear  $\text{CuX}_2$  (X = Cl, Br) Motif-Built Hybrid Copper Halides Realizing Encouraging Nonlinear Optical Activities, *Inorg. Chem. Front.*, 2023, **10**, 3319–3325.
- [4]. Q. Wua, C. Yang, X. Liu, J. Ma, F. Liang, Y. S. Du, Dimensionality Reduction Made High-Performance Mid-Infrared Nonlinear Halide Crystal, *Mater. Today Phys.*, 2021, **21**, 100569.
- [5]. L. He, Y. T. Liu, P. P. Shi, H. L. Cai, D. W. Fu, Q. Ye, Energy Harvesting and Pd(II) Sorption Based on Organic-Inorganic Hybrid Perovskites, *ACS Appl. Mater. Interfaces.*, 2020, **12**, 53799–53806.
- [6]. W. Q. Liao, H. Y. Ye, D. W. Fu, P. F. Li, L. Z. Chen, Y. Zhang, Temperature-Triggered Reversible Dielectric and Nonlinear Optical Switch Based on the One-Dimensional Organic-Inorganic Hybrid Phase Transition Compound  $[\text{C}_6\text{H}_{11}\text{NH}_3]_2\text{CdCl}_4$ , *Inorg. Chem.*, 2014, **53**, 11146–11151.
- [7]. Z. Y. Bai, J. Y. Lee, H. Kim, C. L. Hu, K. M. Ok, Unveiling the Superior Optical Properties of Novel Melamine-Based Nonlinear Optical Material with Strong Second-Harmonic Generation and Giant Optical Anisotropy, *Small*, 2023, **19**, 2301756.
- [8]. H. Y. Wu, C. L. Hu, M. B. Xu, Q. Q. Chen, N. Ma, X. Y. Huang, K. Z. Du, J. Chen, From  $\text{H}_{12}\text{C}_4\text{N}_2\text{CdI}_4$  to  $\text{H}_{11}\text{C}_4\text{N}_2\text{CdI}_3$ : a Highly Polarizable  $\text{CdNI}_3$  Tetrahedron Induced a Sharp Enhancement of Second Harmonic Generation Response and Birefringence, *Chem. Sci.*, 2023, **14**, 9533–9542.
- [9]. J. J. Wu, Y. Guo, J. L. Qi, W. D. Yao, S. X. Yu, W. L. Liu and S. P. Guo, Multi-Stimuli Responsive Luminescence and Domino Phase Transition of Hybrid Copper Halides with Nonlinear Optical Switching Behavior, *Angew. Chem. Int. Ed.*, 2023, **62**, e202301937
- [10]. L. H. Liu, Z. Y. Bai, L. Hu, D. S. Wei, Z. B. Lin, L. Z. Zhang, A Melamine-Based Organic-Inorganic Hybrid Material Revealing Excellent Optical Performance and Moderate Thermal Stability, *J. Mater. Chem. C.*, 2021, **9**, 7452–7457
- [11]. X. Q. Ji, S. N. Geng, S. Zhang, Y. P. Gong, X. Y. Zhang, R. Q. Li, Y. Liu, J. Chen, R. Chen, Z. W. Xiao, L. L. Mao, Chiral 2D Cu(I) Halide Frameworks, *Chem. Mater.*, 2022, **34**, 8262–8270.
- [12]. M. H. Choi, S. H. Kim, H. Y. Chang, P. S. Halasyamani, K. M. Ok, New Noncentrosymmetric Material- $[\text{N}(\text{CH}_3)_4]\text{ZnCl}_3$ : Polar Chains of Aligned  $\text{ZnCl}_4$  Tetrahedra. *Inorg. Chem.*, 2009, **48**, 8376–8382.
- [13]. M. M. Zhao, L. Zhou, P. P. Shi, X. Zheng, X. G. Chen, J. X. Gao, F. J. Geng, Q. Ye, and D. W. Fu, Halogen Substitution Effects on Optical and Electrical Properties in 3D Molecular Perovskites, *Chem. Commun.*, 2018, **54**, 13275–13278.
- [14]. C. Yang, X. Liu, C. L. Teng, Q. Wu, F. Liang, Syntheses, Structure and Properties of a New series of Organic-Inorganic Hg-Based Halides: Adjusting Halogens Resulted in Huge Performance Mutations, *Dalton Trans.*, 2021, **50**, 7563–7570.
- [15]. L. S. Li, Y. H. Tan, W. J. Wei, H. Q. Gao, Y. Z. Tang, X. B. Han, Chiral Switchable Low-Dimensional Perovskite Ferroelectrics, *ACS Appl. Mater. Interfaces.*, 2021, **13**, 2044–2051.
- [16]. L. Zhou, X. Zheng, P. P. Shi, Z. Zafar, H. Y. Ye, D. W. Fu and Q. Ye, Switchable Nonlinear Optical and Tunable Luminescent Properties Triggered by Multiple Phase Transitions in a Perovskite-Like Compound, *Inorg. Chem.*, 2017, **56**, 3238–324416.

- [17]. J. Cheng, Y. Deng, X. Dong, J. Li, L. Huang, H. Zeng, G. Zou and Z. Lin, Homochiral Hybrid Organic-Inorganic Cadmium Chlorides Directed by Enantiopure Amino Acids, *Inorg. Chem.*, 2022, **61**, 11032–11035.
- [18]. C. Shen, J. Liu, K. Wu, L. Xu, D. Sun, Y. Dang, J. Wang and D. Wang, High stability and moderate second-order nonlinear optical properties of hybrid lead-free perovskite  $[(\text{CH}_3)_3\text{NCH}_2\text{Cl}]\text{CdCl}_3$  bulk crystals, *CrystEngComm*, 2023, **25**, 2264–2270.
- [19]. O. V. Dolomanov, L. J. Bourhis, R. J. Gildea, J. A. K. Howard, H. Puschmann, H. OLEX2: a complete structure solution, refinement and analysis program, *J. Appl. Crystallogr.*, 2009, **42**, 339–341.
- [20]. Y. Guo, S. F. Yan, W. D. Yao, H. Y. Chen, W. I. Liu, J. J. Wu and S. P. Guo, Dual Monomeric Inorganic Units Constructed Bright Emissive ZeroDimensional Antimony Chlorides with Solvent-Induced Reversible Structural Transition, *Inorg. Chem.*, 2023, **62**, 13692-13697.
- [21]. S. K. Kurtz, T. T. Perry, A powder technique for the evaluation of nonlinear optical materials, *J. Appl. Phys.*, 1968, **39**, 3798–3813.
- [22]. M. D. Segall, P. L. D. Lindan, M. J. Probert, C. J. Pickard, P. J. Hasnip, S. J. Clark, M. C. Payne, First-principles simulation: ideas, illustrations and the CASTEP code, *J. Phys.: Condens. Matter.*, 2002, **14**, 2717–2744.
- [23]. J. P. Perdew, K. Burke, M. Ernzerhof, Generalized gradient approximation made simple, *Phys. Rev. Lett.*, 1996, **77**, 3865–38685.
- [24]. S. F. Li, X. M. Jiang, B. W. Liu, D. Yan, C. S. Lin, H. Y. Zeng, G. C. Guo, Superpolyhedron-Built Second Harmonic Generation Materials Exhibit Large Mid-Infrared Conversion Efficiencies and High Laser-Induced Damage Thresholds, *Chem. Mater.*, 2017, **29**, 1796–1804.
- [25]. X. M. Jiang, G. E. Wang, Z. F. Liu, M. J. Zhang, G. C. Guo, Large Mid-IR Second-Order Nonlinear-Optical Effects Designed by the Supramolecular Assembly of Different Bond Types without IR Absorption, *Inorg. Chem.*, 2013, **52**, 8865–8871.
